# Supplementary material for: Metabolic shifts toward glutamine regulate tumor growth, invasion and bioenergetics in ovarian cancer
Source: PubMed Central journal article supplement (PMC4188042; doi:10.1002/msb.20134892), 2014-05-05
Supplement: MSB-10-5-728-s01.pdf [file MSB-10-5-728-s01.pdf]

## Supplementary Table S1: OVCAR3 and SKOV3 Amino Acids Uptake/Secretion Rate in Complete Medium

|       | OVCAR3 (nmol/Kcells) |        | SKOV3 (nmol/Kcells) |        | P Value |
|-------|----------------------|--------|---------------------|--------|---------|
|       | Average              | SEM    | Average             | SEM    |         |
| HyPro | -0.2153              | 0.0771 | 0.1805              | 0.2756 |         |
| Asn   | 0.0373               | 0.0693 | 0.3816              | 0.1850 |         |
| 3MH   | -0.0635              | 0.0889 | 0.0548              | 0.1209 |         |
| Tau   | 0.0151               | 0.0726 | -0.0838             | 0.0883 |         |
| 1MH   | 0.0599               | 0.0564 | -0.0338             | 0.0737 |         |
| Carn  | -0.0047              | 0.0019 | -0.0150             | 0.0088 |         |
| Arg   | 0.2538               | 0.2082 | 1.0561              | 0.5308 |         |
| EA    | 0.0036               | 0.0018 | 0.0102              | 0.0021 | *       |
| B-Ala | 0.0018               | 0.0015 | -0.0039             | 0.0020 | **      |
| AADA  | -0.0062              | 0.0010 | -0.0194             | 0.0018 | ***     |
| BAIB  | -0.0098              | 0.0032 | -0.0608             | 0.0115 | ***     |
| Hyl1  | 0.0006               | 0.0003 | 0.0007              | 0.0006 |         |
| Hyl2  | 0.0003               | 0.0005 | 0.0102              | 0.0051 | *       |
| AABA  | -0.0005              | 0.0004 | 0.0013              | 0.0004 | **      |
| Cyst  | -0.0048              | 0.0014 | 0.0005              | 0.0008 | ***     |
| Tyr   | 0.0015               | 0.0174 | 0.1077              | 0.0686 |         |

+ : Uptake; - : Secrete

**Supplementary Table S1:** OVCAR3 and SKOV3's amino acids metabolic fluxes, mean  $\pm$  SEM, n $\geq$ 12.

\*P<0.05, \*\*P<0.01, \*\*\*P<0.001. HyPro, hydroxyproline; Asn, Asparagine; 3MH, 3-methylhistidine; Tau, taurine; 1MH, 1-methylhistidine; Arg, arginine; EA, ethanolamine; B-ala,  $\beta$ -alanine; GABA,  $\gamma$ -amino-N-butyric acid; AADA,  $\alpha$ -amino adipic acid; BAIB,  $\beta$ -aminoisobutyric acid; Hyl1, hydroxylysine 1; Hyl2, hydroxylysine 2; AABA,  $\alpha$ -amino-N-butyric acid; Cyst, Cystathionine. Tyr, tyrosine.
