# Supplementary material for: Metabolic shifts toward glutamine regulate tumor growth, invasion and bioenergetics in ovarian cancer
Source: PubMed Central journal article supplement (PMC4188042; doi:10.1002/msb.20134892), 2014-05-05
Supplement: MSB-10-5-728-s03.pdf [file MSB-10-5-728-s03.pdf]

Figure S8

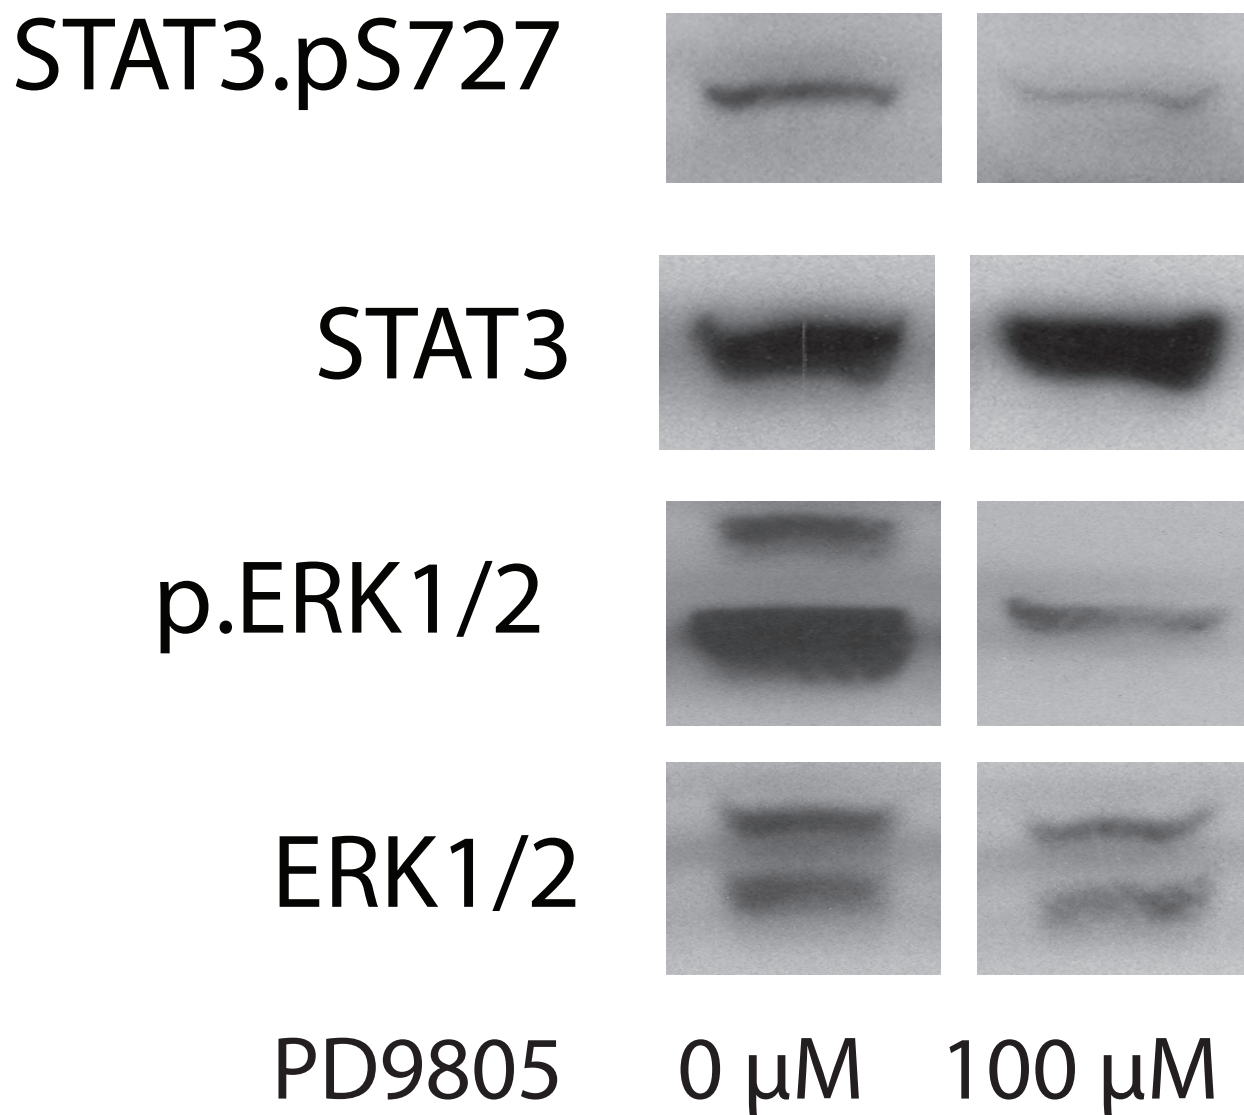

**Supplementary Figure S8.** STAT3 serine phosphorylation level at the addition of PD98059, a MEK/ERK pathway inhibitor. Here the ERK 1/2 is the loading control.

!
