# Supplementary material for: Metabolic shifts toward glutamine regulate tumor growth, invasion and bioenergetics in ovarian cancer
Source: PubMed Central journal article supplement (PMC4188042; doi:10.1002/msb.20134892), 2014-05-05
Supplement: MSB-10-5-728-s04.pdf [file MSB-10-5-728-s04.pdf]

Fig. S2  
A

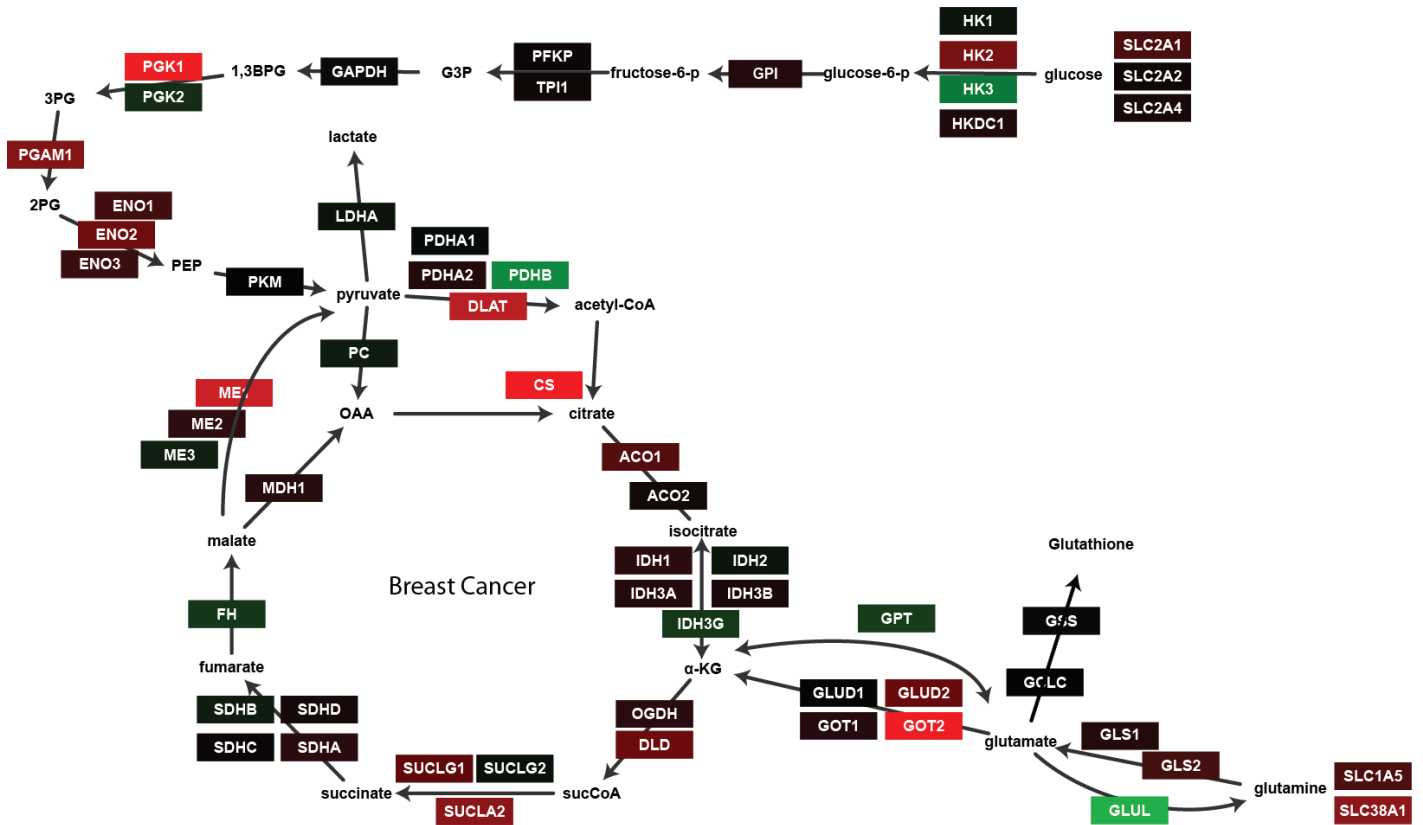

B

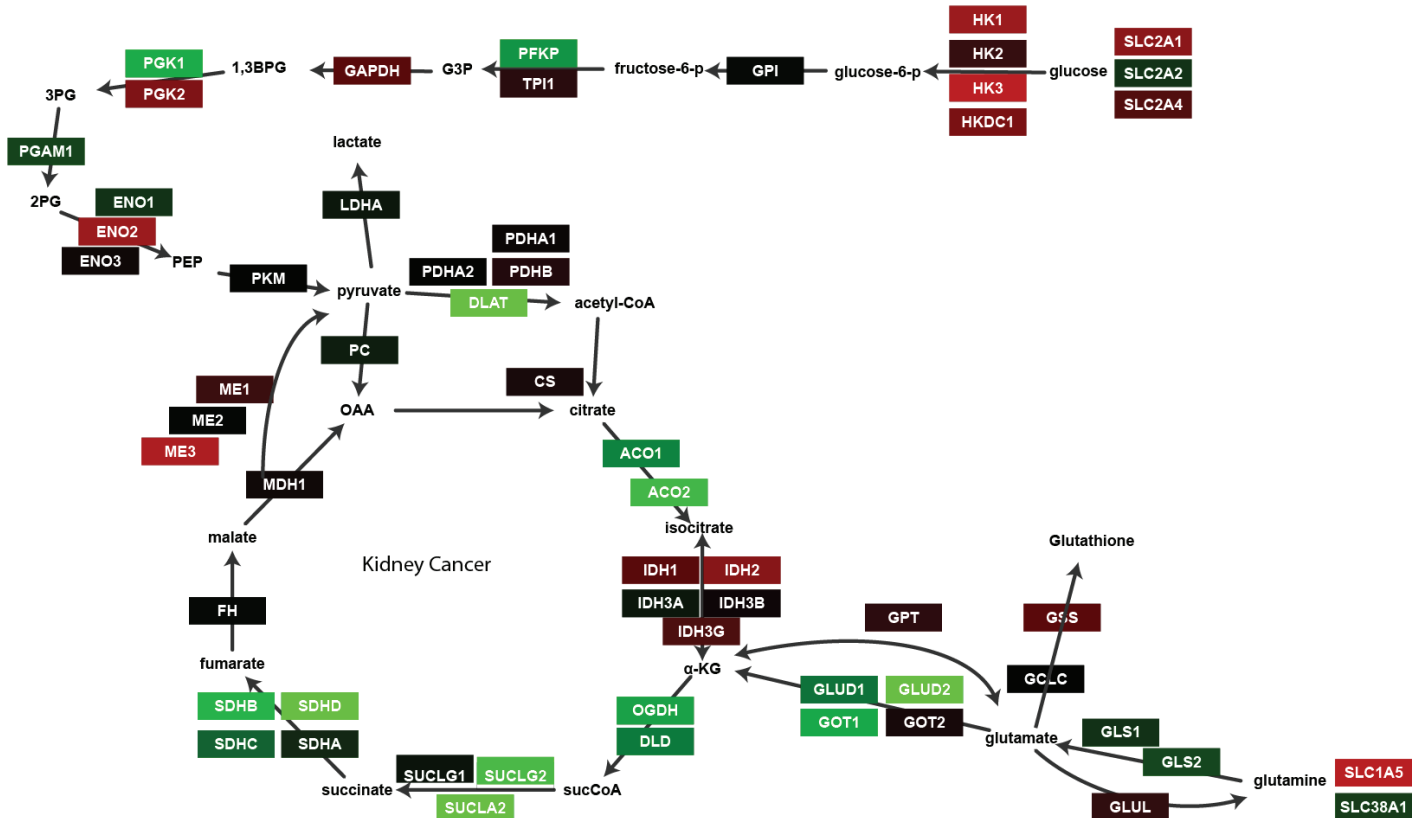

**Supplementary Figure S2.** Genes in the glutaminolysis and TCA cycle metabolic pathways are associated with higher risk in breast cancer patients (A) and kidney cancer patients (B).
