# Supplementary material for: Metabolic shifts toward glutamine regulate tumor growth, invasion and bioenergetics in ovarian cancer
Source: PubMed Central journal article supplement (PMC4188042; doi:10.1002/msb.20134892), 2014-05-05
Supplement: MSB-10-5-728-s06.pdf [file MSB-10-5-728-s06.pdf]

Figure S7

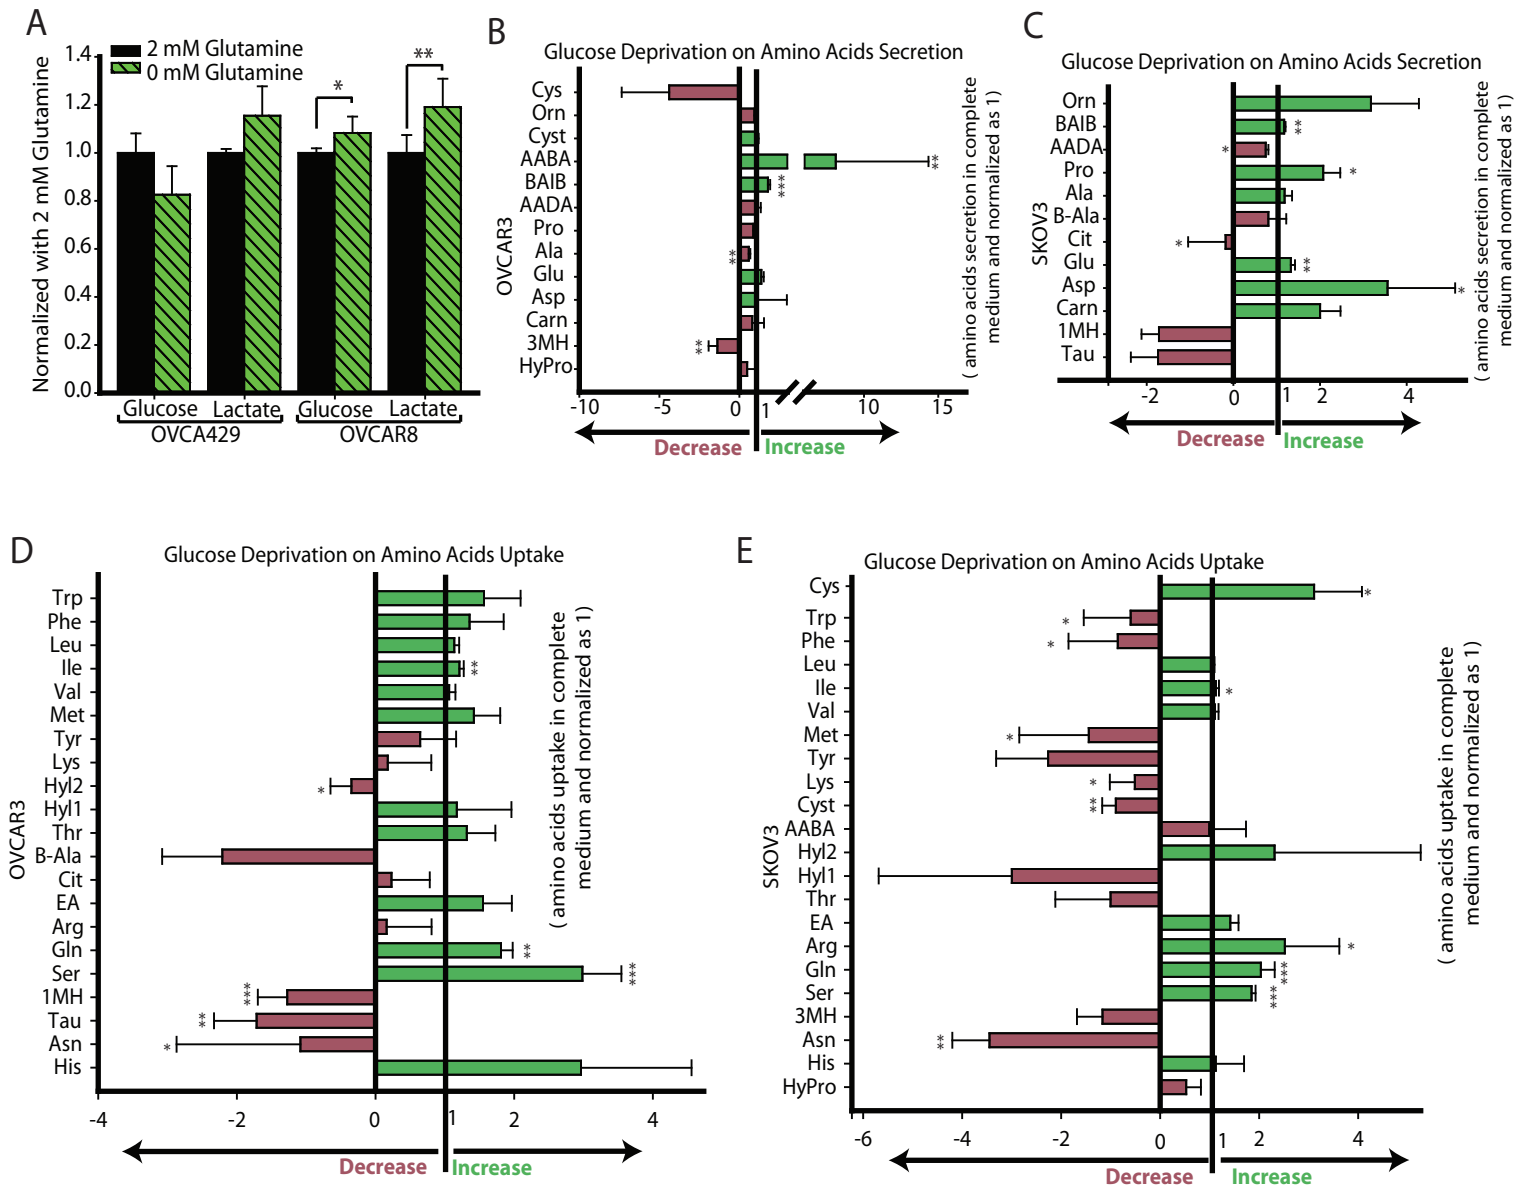

**Supplementary Figure S7.** (A) Gln's effect on glycolysis for OVCA429 and OVCAR8 cells. (B-E) Amino acid uptake/secretion rate after glucose deprivation measured using UPLC in OVCAR3 (B,D) and SKOV3 (C, E) cells. Data in A-E are expressed as mean  $\pm$  SEM,  $n \geq 6$ .
