# Supplementary material for: Metabolic shifts toward glutamine regulate tumor growth, invasion and bioenergetics in ovarian cancer
Source: PubMed Central journal article supplement (PMC4188042; doi:10.1002/msb.20134892), 2014-05-05
Supplement: MSB-10-5-728-s09.pdf [file MSB-10-5-728-s09.pdf]

Figure S5

A

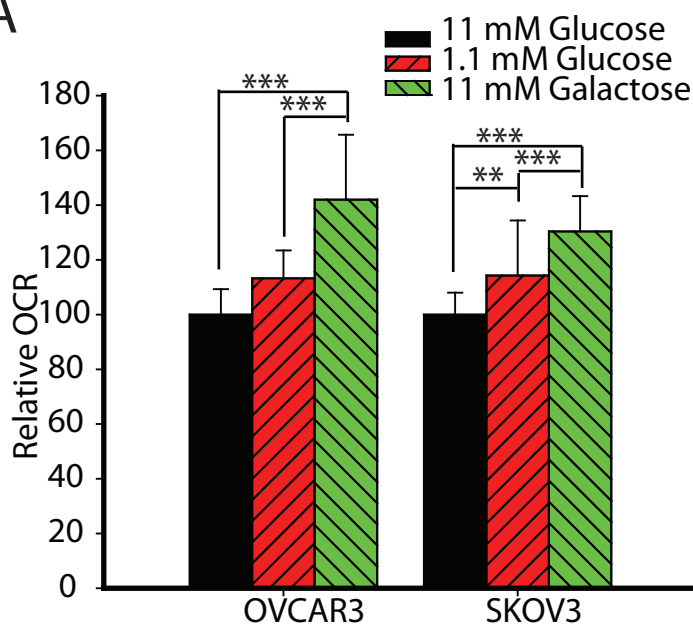

B

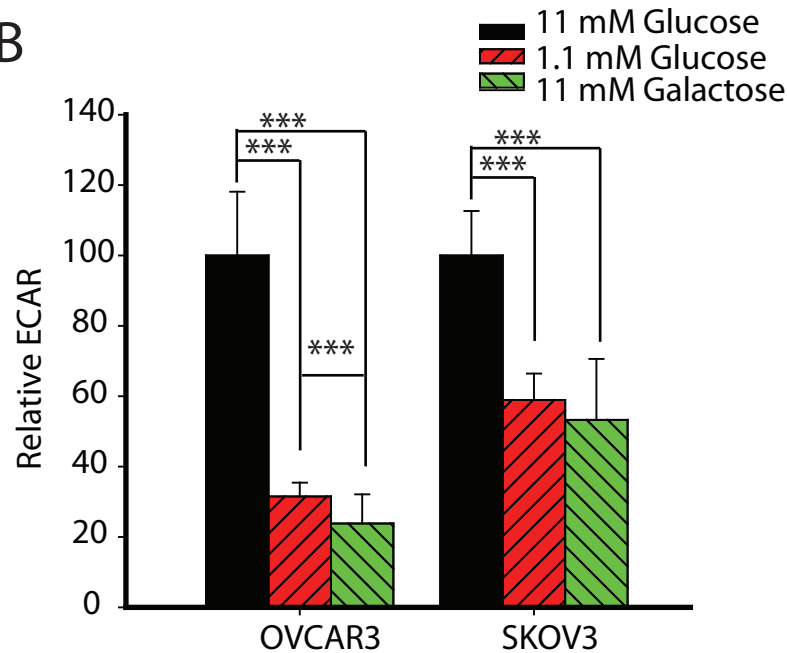

Supplementary Figure S5. (A,B) Galactose and low glucose's effect on OCR (A) and ECAR (B) values. Data in A-B are expressed as mean ± SEM, n≥9, \*P<0.05, \*\*P<0.01, \*\*\*P<0.001.
