# Supplementary material for: Metabolic shifts toward glutamine regulate tumor growth, invasion and bioenergetics in ovarian cancer
Source: PubMed Central journal article supplement (PMC4188042; doi:10.1002/msb.20134892), 2014-05-05
Supplement: MSB-10-5-728-s10.pdf [file MSB-10-5-728-s10.pdf]

Figure S3

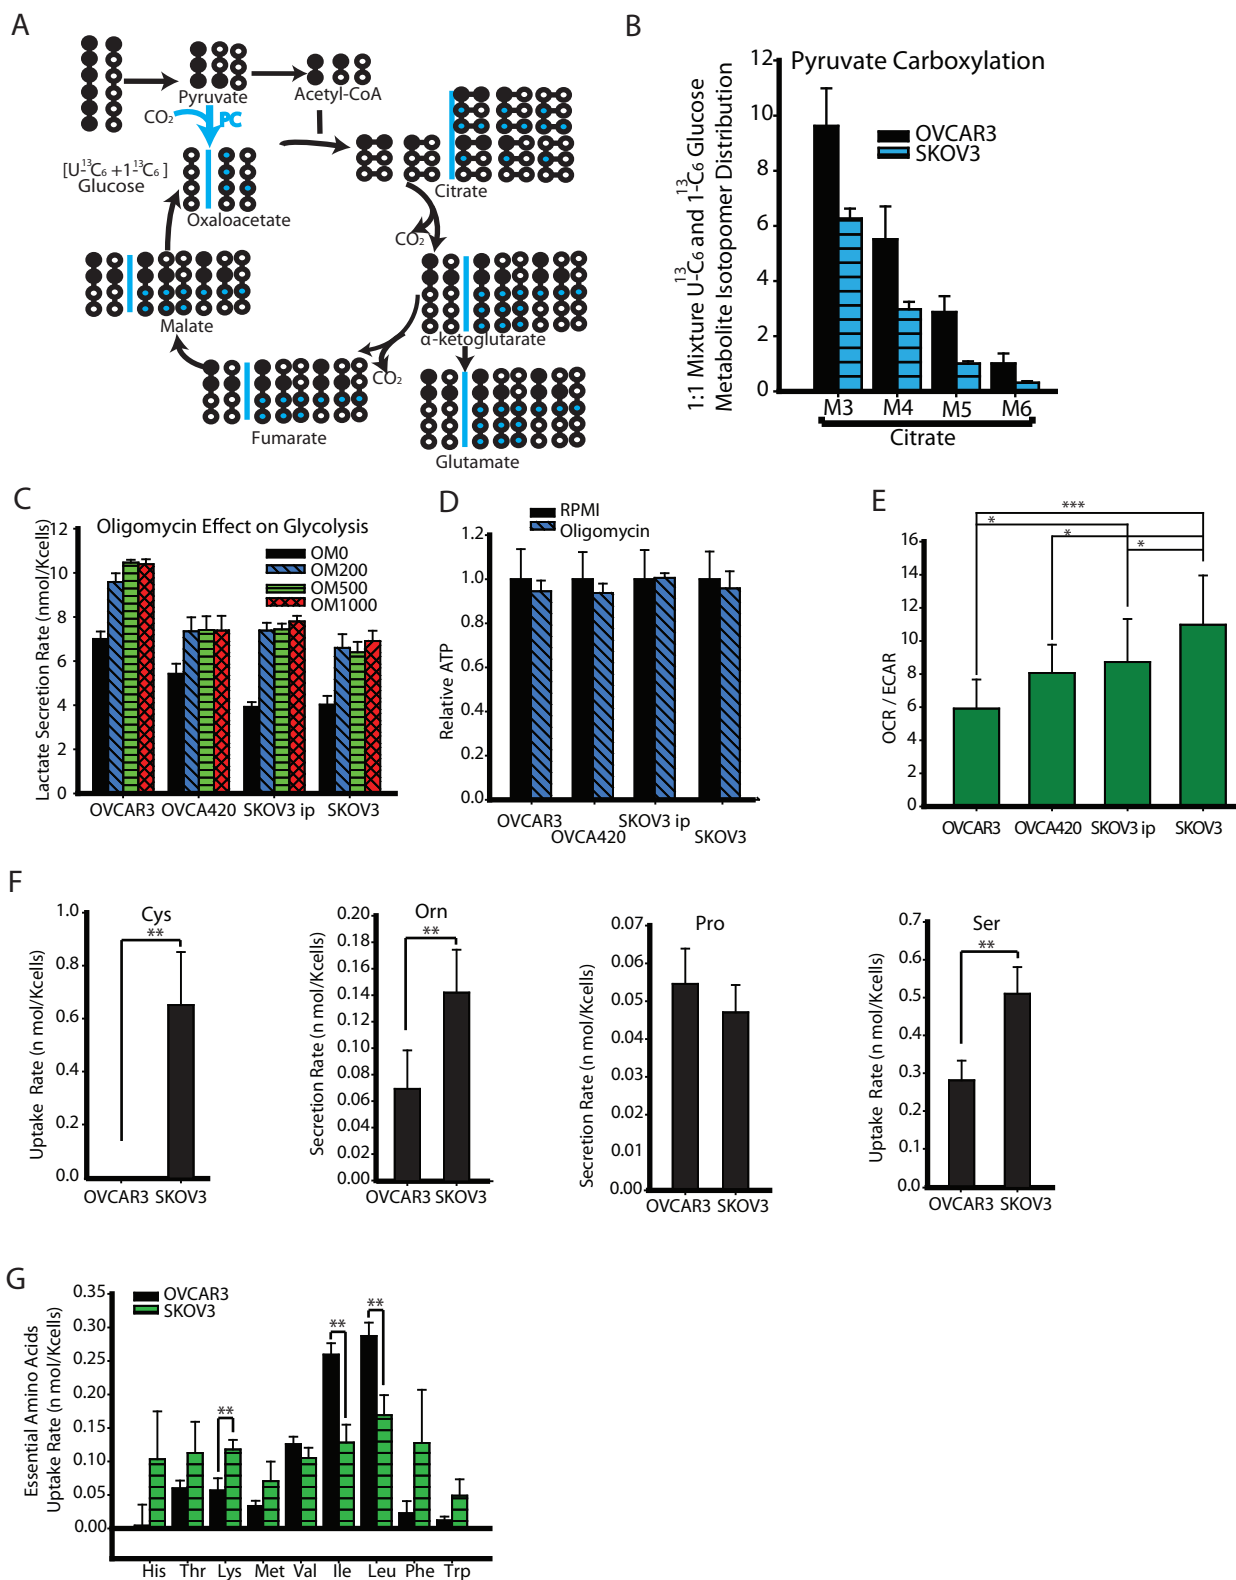

**Supplementary Figure S3.** (A) Schematic of carbon atom transitions undergoing pyruvate carboxylation using 1:1 mixture of  $^{13}\text{C}_6$  glucose and  $1\text{-}^{13}\text{C}$  labeled glucose. Blue circle represents labeled carbon through PC. M3 and M1 pyruvate is directly converted into oxaloacetate by combining with  $\text{CO}_2$  through pyruvate carboxylase. (B) Citrate isotopomer distribution using 1:1 mixture of  $^{13}\text{C}_6$  glucose and  $1\text{-}^{13}\text{C}$  labeled glucose medium. (C) Effect of varying oligomycin (OM) concentrations (200, 500, 1000 ng/ml) on glycolysis. (D) Oligomycin's effect on ATP content. (E) Basal OCR/ECAR of OVCAR3, OVCA420, SKOV3ip and SKOV3 cells. (F) Uptake/secretion rate of cysteine (Cys), ornithine (Orn), proline (Pro) and serine (Ser) of OVCAR3 and SKOV3 cells in complete medium. (G) Uptake/secretion rate of essential amino acids for OVCAR3 and SKOV3 in complete medium. His, histidine; Thr, threonine; Lys, lysine; Met, methionine; Val, valine; Ile, isoleucine; Leu, leucine; Phe, phenylalanine; Trp, tryptophan Data in B-G are expressed as mean  $\pm$  SD,  $n \geq 9$ , \* $P < 0.05$ , \*\* $P < 0.01$ , \*\*\* $P < 0.001$ .
